1 Title: Developmental plasticity of *Brachypodium distachyon* in response to P deficiency: modulation by  
2 inoculation with phosphate-solubilizing bacteria

3

4 Caroline Baudson, Benjamin M. Delory, Stijn Spaepen, Patrick du Jardin, Pierre Delaplace

5

6 Affiliation

7 Caroline Baudson

8 ORCID: 0000-0001-8749-6480

9 Plant Sciences, Gembloux Agro-Bio Tech, University of Liège, Belgium

10 Benjamin M. Delory

11 ORCID: 0000-0002-1190-8060

12 Institute of Ecology, Leuphana University, Lüneburg, Germany

13 Stijn Spaepen

14 ORCID: 0000-0001-5465-8287

15 Leuven Institute for Beer Research, University of Leuven, Belgium

16 Patrick du Jardin

17 Plant Sciences, Gembloux Agro-Bio Tech, University of Liège, Belgium

18 Pierre Delaplace

19 ORCID: 0000-0001-6198-7820

20 Plant Sciences, Gembloux Agro-Bio Tech, University of Liège, Belgium

21

22 Corresponding author : Pierre Delaplace, pierre.delaplace@uliege.be, +32 81 622450

23 Abstract

24 Background Mineral P fertilisers must be used wisely in order to preserve rock phosphate, a limited and non-  
25 renewable resource. The use of bio-inoculants to improve soil nutrient availability and trigger an efficient plant  
26 response to nutrient deficiency is one potential strategy in the attempt to decrease P inputs in agriculture.

27 Method A gnotobiotic co-cultivation system was used to study the response of *Brachypodium distachyon* to  
28 contrasted P supplies (soluble and poorly soluble forms of P) and inoculation with P solubilizing bacteria.  
29 *Brachypodium's* responses to P conditions and inoculation with bacteria were studied in terms of developmental  
30 plasticity and P use efficiency.

31 Results *Brachypodium* showed plasticity in its biomass allocation pattern in response to variable P conditions,  
32 specifically by prioritizing root development over shoot productivity under poorly soluble P conditions. Despite  
33 the ability of the bacteria to solubilize P, shoot productivity was depressed in plants inoculated with bacteria,  
34 although the root system development was maintained. The negative impact of bacteria on biomass production in  
35 *Brachypodium* might be attributed to inadequate C supply to bacteria, an increased competition for P between  
36 both organisms under P-limiting conditions, or an accumulation of toxic bacterial metabolites in our cultivation  
37 system. Both P and inoculation treatments impacted root system morphology. The modulation of  
38 *Brachypodium's* developmental response to P supplies by P solubilizing bacteria did not lead to improved P use  
39 efficiency.

40 Conclusion Our results support the hypothesis that plastic responses of *Brachypodium* cultivated under P-limited  
41 conditions are modulated by P solubilizing bacteria. The considered experimental context impacts plant–bacteria  
42 interactions. Choosing experimental conditions as close as possible to real ones is important in the selection of P  
43 solubilizing bacteria. Both persistent homology and allometric analyses proved to be useful tools that should be  
44 considered when studying the impact of bio-inoculants on plant development in response to varying nutritional  
45 context.

46

47 Keywords

48 biomass allocation, root system morphology, P use efficiency, bio-inoculants, P solubilizing bacteria

49

50 Abbreviations

51 HA hydroxyapatite

52 PPUE physiological P use efficiency

53 PSB phosphate-solubilizing bacteria

54 PUpE P uptake efficiency

55 PUE P utilization efficiency

56 PUE P use efficiency

57 RMF root mass fraction

58 SMA standardized major axis

59 TCP tricalcium phosphate

60 TRL total root length

## 61 **1 Introduction**

62 An important challenge for this century is to implement sustainable cropping systems that preserve the  
63 environment and non-renewable resources. This is particularly true concerning phosphate rock, a finite resource  
64 mined from only a few countries (Cooper et al. 2011). Phosphate rock constitutes the main source of phosphorus  
65 inorganic fertiliser and has been extensively used by farmers in industrialized countries during the past century.  
66 Given the growing demand for food, the increasing demand for P fertilisers is predicted to continue (mainly in the  
67 developing countries). Although this is a controversial issue, it is estimated that global commercial P reserves  
68 could be depleted within 50 to 100 years (Cordell et al. 2009). In the foreseeable future, a peak in P production is  
69 expected in 2033. This implies that the growing demand for P will overtake the economically available supply due  
70 to decreasing quality and accessibility of the remaining phosphate rock reserves (Cordell and White 2011). As the  
71 European Union is strongly dependent on P imports (van Dijk et al. 2016), phosphate rock has been classified as  
72 a “critical raw material” by the European Commission since 2014 (European Commission 2014). These  
73 considerations emphasize the necessity of adapting fertilisation strategies.

74 In industrialized countries, the excessive use of P fertilisers has led to an accumulation of P in agricultural soils,  
75 constituting a new source of P reserves known as “legacy soil P” (van Dijk et al. 2016; Menezes-Blackburn et al.  
76 2018; Rowe et al. 2016). In some regions, this accumulation has reached levels that generate an environmental  
77 risk of watercourse contamination and subsequent eutrophication (Haygarth et al. 2014). It has been estimated that  
78 the total soil P stock for arable and grassland soils represents  $352 \pm 26$  years of agronomic P use, with  
79 orthophosphate and monoester (organic) phosphate accounting for the greatest proportion (study based on 258  
80 different soils collected in Europe, Oceania and North America; Menezes-Blackburn et al. 2018). However, this  
81 soil P reserve is unavailable to plants due to the capacity of many soils to fix P (Shen et al. 2011). Soil P reserve  
82 mobilizing technologies must be developed in order to reduce the use of inorganic P fertilisers. The requirement  
83 for inorganic P fertilisers could be reduced by 50% if legacy soil P was included in nutrient management practices  
84 (Sattari et al. 2012).

85 Plants have developed strategies to cope with P deficiency and enhance their P use efficiency (PUE), including  
86 alteration of the root morphology and architecture, as well as exudation of carboxylates and hydrolytic enzymes  
87 for P solubilization. Micro-organisms can also be useful in mobilizing soil P reserves, by directly increasing the P  
88 availability in soils (through solubilization) or enhancing plant P nutrition processes (through hormonal stimulation  
89 of root growth, for example) (Richardson et al. 2011). The use of micro-organisms, broadly called biological  
90 inoculants (“bio-inoculants”), is considered a technology to improve soil P use by crops and pastures (Owen et al.  
91 2015). Those products belong to the biostimulants category as defined by du Jardin (2015). Biostimulants  
92 including substances and/or microorganisms act in addition to fertilisers, with the aim of optimising the efficiency  
93 of those fertilisers and reducing nutrient application rates (European Parliament and Council of the EU 2019).

94 Plants exhibit modular growth, potentially allowing them to add new branches to their body. New meristems are  
95 exposed to the direct influence of the environment, making plant growth a flexible process (Schmid 1992).  
96 Phenotypic plasticity, i.e. the environment-driven alteration of a phenotype, gives the plant a great potential to  
97 respond to fluctuating environments (Nicotra et al. 2010; Schmid 1992). It is, at least in part, genetically controlled  
98 and heritable (Nicotra et al. 2010). Breeding programs have traditionally opted for phenotypic stability over  
99 plasticity, ensuring high yield in constant agricultural systems with high inputs. However, the uncertainty of the

100 future environment and climate requires us to reconsider the place of phenotypic plasticity in breeding strategies.  
101 Indeed, phenotypic plasticity can be an advantage to plants living in changing or heterogeneous environments by  
102 increasing plant fitness (Lobet et al. 2019; Nicotra et al. 2010). The plastic response of plants to abiotic factors and  
103 to the presence of microorganisms still needs clarification. Additionally, the microbial-triggered change in plants'  
104 plastic response to P deficiency deserves greater attention in order to optimize plant P nutrition and reduce the use  
105 of fertilisers (Goh et al. 2013).

106 This study aimed to characterize *Brachypodium distachyon*'s response to contrasted P supplies (soluble and poorly  
107 soluble forms of P), as well as the impact of plant inoculation with single strains of phosphate-solubilizing bacteria  
108 (PSB) on this response in terms of developmental plasticity. The following hypotheses were tested: (i) biomass  
109 allocation and root system development in *Brachypodium* show plasticity in response to contrasted P conditions;  
110 (ii) inoculation with PSB modulates the plant's plastic response to contrasted P supplies; and (iii) this modulation  
111 induces changes in plant PUE. Biomass accumulation and allocation, shoot P concentration and PUE, as well as  
112 root architectural traits, were considered. *Brachypodium*'s developmental plasticity was assessed using tools  
113 including allometry analysis for the biomass allocation and persistent homology analysis for the root system  
114 architecture (RSA). It is the first time, to our knowledge, that these tools have been used to precisely evaluate the  
115 impact of biostimulants on a plant's response to nutrient limitation.

## 116 **2 Material and Methods**

### 117 **2.1 Plant and bacterial material**

118 *Brachypodium distachyon* (L.) P. Beauv. (Bd21 line) caryopses were kindly provided by Dr Philippe Vain from  
119 the John Innes Centre (Norwich, UK) and propagated under greenhouse conditions.

120 Four bacterial strains were selected for their potential plant growth promotion and phosphorus solubilization  
121 capacities: *Bacillus velezensis* GB03 (BveGB03), *Bacillus velezensis* FZB42 (BveFZB42), *Pseudomonas*  
122 *fluorescens* 29ARP (Pfl29ARP) and *Azotobacter vinelandii* F0819 (AviF0819). The *Bacillus* strains were selected  
123 for their plant growth promotion activities on *Poaceae* (Delaplace et al. 2015; Myresiotis et al. 2015; Zhang et al.  
124 2014), as well as their ability to solubilize different forms of P (Giles et al. 2014; Idris et al. 2007; Idriss et al.  
125 2002; Liu et al. 2015). *Pseudomonas fluorescens* also exhibited P solubilizing activities and promoted wheat  
126 (Shaharouna et al. 2008) and maize growth (Li et al. 2017). *Azotobacter vinelandii*, a free diazotrophic bacteria,  
127 exhibited P solubilization activity (Nosrati et al. 2014) and PGP traits (Taller and Wong 1989). *Escherichia coli*  
128 DH5 $\alpha$  99B829 (Eco99B829), was selected as a negative control for plant growth promotion (Delaplace et al. 2015;  
129 Wu et al. 2016; Zhou et al. 2016). The strains BveGB03 and Eco99B829 were kindly provided by Dr Paul W. Paré  
130 and Dr John McInroy (Texas Tech University, Lubbock, TX, USA), Pfl29ARP by Dr Alain Sarniguet (Institut  
131 National de la Recherche Agronomique, Rennes, France), AviF0819 by the Katholieke Universiteit Leuven  
132 (Leuven, Belgium), and BveFZB42 by Pr Rainer Borriss (Nord Reet UG, Greifswald, Germany). The bacterial  
133 strains were stored at 80°C in LB medium containing 20% v/v glycerol before plating.

### 134 **2.2 In vitro P solubilization assay**

135 One week before the experiment, the bacteria were plated on LB agar plates (2.5% w/v LB broth, Prod. No. L3152;  
136 1.5% w/v agar, Prod. No. 05039, Sigma-Aldrich Co., St. Louis, USA) and incubated at 28°C. The day before the  
137 experiment, the bacteria were suspended in 40 ml of LB (2.5% w/v LB broth) and incubated overnight at 150 rpm  
138 and 30°C (Innova 4340, New Brunswick Scientific Co. Inc., Edison, USA). The concentration of the bacterial

139 suspensions was derived from the optical density, measured at 540 nm. The tubes were centrifuged (20 min at  
140 4000 rpm) and the LB medium was removed. The bacterial pellets were rinsed with 25 ml of 10 mM MgSO<sub>4</sub> in  
141 order to avoid P contaminations. The tubes were centrifuged again (20 min at 4000 rpm) and the MgSO<sub>4</sub> solution  
142 was removed. The bacteria were suspended in an adequate volume of NBRIP medium (National Botanical  
143 Research Institute's phosphate growth medium, Nautiyal 1999) containing tricalcium phosphate (Ca<sub>3</sub>(PO<sub>4</sub>)<sub>2</sub>,  
144 hereafter named "TCP", Prod. No. C0506.1000, Duchefa Biochemie, Haarlem, The Netherlands) or  
145 hydroxyapatite (Ca<sub>5</sub>(PO<sub>4</sub>)<sub>3</sub>OH, hereafter named "HA", Prod. No. 8450.1, Carl Roth GmbH + Co. KG, Karlsruhe,  
146 Germany) at a concentration of 5 g/l (pH 7) in order to obtain a bacterial concentration of 10<sup>7</sup> CFU/ml. Bottles  
147 containing 90 ml of NBRIP medium were successively inoculated with 10 ml of the prepared suspensions to obtain  
148 a final concentration of 10<sup>6</sup> CFU/ml, and incubated for 3 days at 30°C and 150 rpm.

149 10 ml were sampled daily for subsequent analysis. 1 ml was subsampled for serial dilution and plating on LB agar  
150 plates in order to monitor bacterial growth. The remaining samples were centrifuged and the supernatant was filter-  
151 sterilized (pore size 0.2 µm) for pH and soluble P content measurements. The P content in the solution (as soluble  
152 phosphate) was measured according to the phosphomolybdate blue colorimetric method (Murphy and Riley 1962)  
153 (Prod. No. 69888, molybdate reagent solution, Fluka Sigma-Aldrich Co., St. Louis, USA).

### 154 **2.3 *Brachypodium*-bacteria co-cultivation in axenic conditions**

155 One week before the experiment, the bacteria were plated on LB agar plates and incubated at 28°C. The day before  
156 the experiment, the bacteria were suspended in 40 ml of LB and incubated overnight at 150 rpm and 30°C. The  
157 tubes were centrifuged (20 min at 4000 rpm) and the LB medium was removed. Inoculums at 10<sup>8</sup> CFU/ml were  
158 finally prepared in 10 mM MgSO<sub>4</sub> for subsequent inoculation of the plantlets.

159 *Brachypodium distachyon* Bd21 seeds were surface sterilized (30 s in 70% v/v ethanol, rinsed once with sterile  
160 water, 10 min in sodium hypochlorite 5% v/v, rinsed three times with sterile water) and stratified for 2 days at 4°C  
161 on Hoagland agar plates (0.125% w/v Hoagland, Prod. No. DU1201, Duchefa Biochemie, Haarlem, The  
162 Netherlands; 0.094% w/v Ca(NO<sub>3</sub>)<sub>2</sub>·4H<sub>2</sub>O; 0.8% w/v Plant agar, Prod. No. P1001, Duchefa Biochemie, Haarlem,  
163 The Netherlands). The seeds were then incubated for 24 hours in a growth chamber (23°C, 16h/8h day light, PPFD  
164 140 µmol.m<sup>-2</sup>.s<sup>-1</sup>) for germination.

165 Homogeneous 24 hour-old plantlets were selected and inoculated with bacteria by dipping them into 10 mM  
166 MgSO<sub>4</sub> containing a bacterial strain at 10<sup>8</sup> CFU/ml for 10 minutes (control plantlets were dipped into 10 mM  
167 MgSO<sub>4</sub>). The plantlets were then transferred into Magenta® boxes (GA-7 Magenta vessel, Magenta LLC,  
168 Lockport, USA) filled with 180 g of sterilized black gravel (rinsed three times with tap water and autoclaved; 1-3  
169 mm quartz gravel, prod. no. 400723, Flamingo, Geel, Belgium) and 50 ml of sterile nutrient solution. One plantlet  
170 was placed into each Magenta® box. Three modified Hoagland nutrient solutions and a reference solution,  
171 corresponding to the contrasting P treatments, were used: a P-limiting supply containing 25µM of KH<sub>2</sub>PO<sub>4</sub> ("P-"),  
172 a P-limiting supply supplemented with 1 g/l TCP ("P-/TCP") or 1 g/l HA ("P-/HA"), and a P-sufficient supply  
173 containing 1mM KH<sub>2</sub>PO<sub>4</sub> ("P+"). The boxes were sealed with Leukopor® tape (prod.no. 02454-00, BSN medical  
174 GmbH, Hamburg, Germany) and incubated in the growth chamber for four weeks (23°C, 16h/8h day light, PPFD  
175 140 µmol.m<sup>-2</sup>.s<sup>-1</sup>). Six independent experiments were performed (three with P-, P-/TCP and P+ treatments; three  
176 with P-, P-/HA and P+ treatments) and five plants were cultivated for each treatment (90 plants per experiment).  
177 Four week-old plants were harvested and cut to measure fresh biomass accumulation in shoot and roots. The

178 presence of bacteria was assessed by scratching agar plates with the root system. The root system was scanned for  
179 three plants per treatment (1200 dpi, Epson Perfection V800 Photo, Epson America Inc., Long Beach, USA) in  
180 order to perform RSA analyses. Shoots were stored at -80°C before P content measurements. Total biomass and  
181 root mass fraction (hereafter named “RMF”, mg root biomass/mg total biomass) were computed from the measured  
182 biomasses. RMF was recorded in order to analyse biomass allocation in *Brachypodium*, considering allocation as  
183 a partitioning process. According to this perspective, plants divide a given amount of resources among structures  
184 according to their developmental priorities (Weiner 2004).

#### 185 **2.4 P concentration in plant tissues**

186 P content in *Brachypodium* shoots was measured by ICP-OES on frozen samples (C.A.R.A.H. ASBL, Ath,  
187 Belgium). The samples were calcinated overnight at 450°C. The ashes were then suspended in nitric acid for  
188 digestion. The P concentration was measured by ICP-OES (Thermo Fisher iCAP 7600, Thermo Fisher Scientific,  
189 Waltham, USA). The five replicates of each treatment in each independent experiment were pooled. Three pooled  
190 samples were analysed for the P-/TCP and P-/HA treatments. Six pooled samples were analysed for the P- and P+  
191 treatments. The results were expressed as total shoot P concentration (µg P/ mg fresh weight).

#### 192 **2.5 Root system architecture measurement**

193 An automated evaluation of the total root length (“TRL”) was performed for all scanned root systems using the  
194 ImageJ macro IJ\_Rhizo (Pierret et al. 2013; Schneider et al. 2012). For each image, the TRL was estimated  
195 using the Kimura method as it provides more accurate length estimates than the other methods available in  
196 IJ\_Rhizo (Delory et al. 2017).

197 In addition, more detailed root system architecture analyses were performed using SmartRoot (Lobet et al. 2011).  
198 Only the 1<sup>st</sup> and 2<sup>nd</sup> order roots were analysed because the thinner, higher order, roots break easily at harvest. These  
199 manual analyses were performed for the control treatment and the two strains found to impact plant development  
200 the most. The RSML (Root System Markup Language) outputs were then processed with the archiDART package  
201 for morphological analysis using persistent homology (R 3.5.2, R core Team 2018; archiDART package version  
202 3.3, Delory *et al.*, 2016; Delory et al. 2018). A geodesic distance function was used to compute a persistence  
203 barcode for each root system. The degree of dissimilarity between barcodes (i.e. root systems) was assessed by  
204 computing a pairwise distance matrix containing dissimilarities calculated using a bottleneck distance method.  
205 Morphological differences between root systems were then visualized using multidimensional scaling (R 3.5.2, R  
206 Core Team 2018).

#### 207 **2.6 P use efficiency**

208 The P use efficiency analysis was performed by considering three different parameters: (i) the P uptake efficiency  
209 (PU<sub>p</sub>E, µg P/mg P applied), corresponding to the shoot P content per unit of soluble P applied; (ii) the P utilization  
210 efficiency (PU<sub>t</sub>E, mg FW/µg P), corresponding to the biomass produced by unit of shoot P; and (iii) the  
211 physiological P use efficiency (PPUE, mg<sup>2</sup> FW/µg P), corresponding to the produced biomass divided by the tissue  
212 P concentration (Neto et al. 2016).

$$213 \quad PU_{pE} = \frac{[P] \times FW}{P_{applied}}$$

$$214 \quad PU_{tE} = \frac{FW}{[P] \times FW}$$

215 
$$PPUE = \frac{FW}{[P]}$$

216 **2.7 Statistical analyses**

217 The relationship between P solubilization and pH variation in the NBRIP medium was studied by performing  
218 regression analyses (lm function, R 3.5.2, R Core Team 2018). The model order was increased until there was not  
219 significant difference with the higher order model (anova function, R 3.5.2, R Core Team 2018).

220 Three-way ANOVAs were performed to study the impact of P supply, bacteria inoculation, independent temporal  
221 repetitions and the interaction between P supply and bacteria inoculation on the following factors: shoot, root and  
222 total biomass parameters; RMF; TRL; shoot P concentration; and the three components of PUE. A model with  
223 crossed fixed factors was applied (lm, glm and anova functions, R 3.5.2, R Core Team 2018; Gamma family  
224 distribution with a log-link function was used for GLM models). Dunnett's post-hoc tests were performed to  
225 compare the treatments to the control situation (non-inoculated plants for inoculation treatment, P+ for P treatment)  
226 (R 3.5.2, R Core Team 2018; multcomp package version 1.4-8, Hothorn et al. 2008).

227 Allometry analyses were performed on shoot and root biomass in order to study the biomass allocation pattern.  
228 The "smatr" package (R 3.5.2, "smatr" version 3.4-8) was used for estimation, inference and plotting of allometric  
229 lines as well as for checking assumptions (Warton et al. 2012). The standardized major axis ("SMA") analysis was  
230 used and all variables were log-transformed. In brief, this analysis consists of a model II regression, estimating  
231 how one variable scales against another. The obtained allometric trajectories depict the relative development of  
232 the shoot and root compartments, i.e. how the root system growth impacts the shoot development. Inference  
233 statistics compare coefficients of the regression lines (slope and elevation) between the populations (Warton et al.  
234 2006). Firstly, differences in slope between groups were tested. If there was no difference in slope between groups,  
235 differences in elevation were tested using a common slope for all groups. When significant differences between  
236 groups were highlighted, pairwise multiple comparisons were performed in order to identify which populations  
237 differed from each other. Differences in slope (i.e. investment in shoot biomass per additional unit of root biomass)  
238 or elevation (i.e. shoot productivity for similar root biomass) among treatments led to different allometric  
239 trajectories. Change in allometric trajectory due to different treatments revealed plasticity in the biomass allocation  
240 process (Weiner 2004; Xie et al. 2015). The analysis of allometric trajectories is complementary to the analysis of  
241 RMF for the study of biomass allocation plasticity.

242 Differences in root system architecture were investigated using permutational multivariate analysis of variance  
243 (PERMANOVA) (R 3.5.2, R Core Team 2018; vegan package version 2.5-4, Oksanen et al. 2019). The  
244 dissimilarity matrix used in the model formula was the pairwise distance matrix returned by the persistent  
245 homology analysis of plant root systems. Bacterial strain, P treatment and their interaction were used as  
246 independent variables in the model. For each fixed factor, a post-hoc test was performed by running a separate  
247 PERMANOVA for each pairwise comparison. *P* values were adjusted for multiple comparisons using the  
248 Bonferroni method.

249 All figures shown in this study were generated using the "ggplot2" package (R 3.5.2, "ggplot2" version 3.1.0).

250 Data and R scripts are accessible on Zenodo repository at <https://doi.org/10.5281/zenodo.3555566>

251

### 252 3 Results

#### 253 3.1 The selected bacterial strains solubilized tricalcium phosphate and hydroxyapatite, while acidifying 254 their growth medium

255 The bacteria's ability to solubilize poorly available forms of P was assessed using TCP and HA in a modified  
256 NBRIP medium. After three days, all the selected strains were able to solubilize both forms of P to some extent  
257 (Fig. 1a) compared to the non-inoculated control treatment. For both forms of P, the best performing bacterial  
258 strains were Eco99B829 and Pfl29ARP. The solubilization of TCP and HA were similar for all bacterial strains  
259 with the exception of Eco99B829, which exhibited a stronger solubilization ability for HA despite a greater  
260 variability between independent replicates. All the strains were able to maintain stationary populations during the  
261 duration of the experiment (data not shown). BveGB03, AviF0819, Pfl29ARP and Eco99B829 generated a pH  
262 drop during the experiment for both forms of P (Fig. 1a). As for the P concentration, Eco99B829 and Pfl29ARP  
263 induced the strongest acidification.

264 Regarding HA solubilization, the relationship between the soluble P concentration and  $\Delta$ pH in the growing  
265 medium was best fitted by a 4<sup>th</sup> order polynomial model (Fig. 1b). The HA solubilization activity clearly intensified  
266 as the acidification became stronger. The regression between soluble P concentration and  $\Delta$ pH for TCP  
267 solubilization was best fitted by a 2<sup>nd</sup> order polynomial model (Fig. 1b). As for HA, the TCP solubilization activity  
268 intensified with increasing pH variation, but to a lesser extent.



269  
270 **Fig. 1** (a) Soluble P concentration and pH variation in NBRIP medium after three days of bacteria cultivation in  
271 the presence of either TCP or HA as poorly soluble forms of P (n=4, mean  $\pm$  SD). (b) Regression curves linking



272 the observed P concentration and the  $\Delta\text{pH}$  in the growing medium after three days of incubation. For each  
273 regression model, adjusted  $R^2$  values are displayed on the graphs. Regression coefficients for HA solubilization:  $y$   
274  $= 0.571 - 0.814x + 2.7675x^2 + 4.219x^3 + 2.039x^4$ ; regression coefficients for TCP solubilization:  $y = 0.513 -$   
275  $1.727x + 0.530x^2$

### 276 **3.2 Biomass accumulation in *Brachypodium* was altered by soluble P deficiency and inoculation with P** 277 **solubilizing bacteria**

278 Shoot biomass production was lower in plants grown under P-, P-/TCP and P-/HA conditions, with a diminution  
279 of 43.1%, 35.2% and 33.4% compared to the P+ treatment, respectively ( $P < 0.001$ , Fig. 2a-d). Plant inoculation  
280 with PSB strains had either no impact or induced a lower shoot biomass accumulation (Fig. 2e). Inoculation with  
281 BveFZB42 and Pfl29ARP led to a significantly lower shoot biomass, with up to 13.2% reduction in plants  
282 inoculated with BveFZB42 under the P+ treatment and 30.3% reduction in plants inoculated with Pfl29ARP under  
283 the P-/TCP treatment ( $P < 0.001$ ). The impact of P conditions on the accumulation of biomass in roots was more  
284 limited, with only plants grown under the P- treatment having a significantly greater root biomass (+13.3%)  
285 compared to the plants exposed to P+ conditions ( $P < 0.001$ , Fig. 2f-i). Inoculation had either no impact or a negative  
286 impact on the accumulation of biomass in roots ( $P = 0.003$ , Fig. 2j). Indeed, plants inoculated with BveFZB42  
287 exhibited a significant reduction of the root biomass of up to 14.5% under the P- treatment. The total biomass  
288 decreased by 27.8%, 25.2% and 24.1% under the P-, P-/TCP and P-/HA treatments respectively ( $P < 0.001$  Fig. 2k-  
289 n). Plant inoculation with PSB strains led to a repression of the biomass accumulation at the whole plant level  
290 ( $P < 0.001$ , Fig. 2o). Inoculation with BveFZB42 and Pfl29ARP induced a significantly lower total biomass in  
291 comparison with the non-inoculated control. The growth reduction reached 12.2% with BveFZB42 under P-/HA  
292 conditions and 21.1% with Pfl29ARP under P- conditions. A table comprising mean values per treatment, standard  
293 deviation and coefficients of ANOVAs is available in Online Resource 1.



294

295 **Fig. 2** Average shoot biomass (a-e), root biomass (f-j), total biomass (k-o) and root mass fraction (p-t) of four-  
 296 week-old *Brachypodium* plantlets exposed to contrasted P supplies and either inoculated or not inoculated with  
 297 bacteria. n = 30 for the P- and P+ treatments, n=15 for the P-/HA and P-/TCP treatments. For each P treatment,  
 298 the grand mean is shown by a dashed horizontal line. For each inoculation treatment, large black-circled dots  
 299 represent mean values, and shaded areas show the density distribution of each population. Individuals are displayed  
 300 as small grey-circled dots in the graphs. In panels e, j, o and t, values are means +/- 95% confidence intervals  
 301 calculated across P treatments

302 **3.3 Shifts in biomass partitioning and allometric trajectories of *Brachypodium* were observed when**  
 303 **exposed to contrasted P supplies and inoculated with P solubilizing bacteria**

304 Exposure of *Brachypodium* to soluble P limitation (P-, P-/HA and P-/TCP) increased RMF by 55.8%, 34.9% and  
 305 35.7% compared to the P+ treatment, respectively ( $P < 0.001$ , Fig. 2p-s). The impact of *Brachypodium* inoculation  
 306 with PSB was dependent on the P environment, as there was a significant interaction between these two variables  
 307 ( $P < 0.001$ ). Plants inoculated with Pf29ARP exhibited the greatest RMF under all treatments (Fig. 2t) and this  
 308 effect was significant for the P-, P-/TCP and P+ treatments (12.1%, 22.7% and 23.4% increase, respectively).

309 Under P- conditions, plants inoculated with BveGB03 and Eco99B829 also had a significantly greater RMF  
310 compared to non-inoculated plants (Fig. 2p-t). Mean values per treatment, standard deviation and coefficients of  
311 ANOVAs are available in Online Resource 1.

312 The allocation pattern between shoots and roots was further analysed using SMA regression models (Fig. 3). In  
313 non-inoculated plants grown under P-/TCP and P-/HA conditions, the shoot biomass increase per unit of root  
314 biomass was greater than that of non-inoculated plants grown under P- and P+ conditions (slopes: 1.15, 1.19, 0.81  
315 and 0.60, respectively;  $P=0.021$ ; Fig. 3a). Non-inoculated plants grown under P+ conditions exhibited the greatest  
316 shoot productivity, but invested the lowest amount of biomass into the shoot per unit of root production.  
317 Inoculation of plants grown under P- conditions did not induce a significant difference in slope ( $P=0.757$ , Fig. 3b).  
318 Significant differences in elevation were observed ( $P<0.001$ ), with non-inoculated plants and plants inoculated  
319 with BveFZB42 showing the greatest shoot productivity and plants inoculated with Pfl29ARP the lowest, for  
320 similar root biomass. Under the P-/HA treatment, slope and elevation did not significantly vary among groups  
321 ( $P=0.174$  and  $0.433$ , respectively; Fig. 3c), even if plants inoculated with BveGB03 and Eco99B829 showed  
322 greater shoot biomass increase per unit of root biomass, when considering the graphical trends. When plants were  
323 grown in the presence of TCP, the inoculation with PSB did not significantly affect the slope ( $P=0.835$ , Fig. 3d).  
324 Elevation was significantly altered when plants were inoculated with Pfl29ARP, leading to the lowest shoot  
325 productivity for similar root biomass (lowest elevation,  $P<0.001$ ). Significant differences in slope were observed  
326 under the P+ treatment ( $P=0.008$ ), with the greatest production of shoot biomass per unit of root production in  
327 plants inoculated with Pfl29ARP, Eco99B829 and BveFZB42 (Fig. 3e). SMA coefficients and results of  
328 covariance analysis are available in Online Resource 2.



329

330 **Fig. 3** Allometric relationship between shoot biomass and root biomass of four-week-old *Brachypodium* plantlets  
 331 exposed to contrasted P supplies and grown with or without bacterial inoculation. X and Y axes are log-scaled.  
 332 Symbols represent individuals. Lines represent SMA regression lines. (a) Non-inoculated plants exposed to  
 333 contrasted P supplies. Inoculated and non-inoculated plants grown under (b) P-, (c) P-/HA, (d) P-/TCP and (e) P+  
 334 conditions

335 **3.4 *Brachypodium* total root length and root system morphology were impacted by P supply and**  
 336 **inoculation with P solubilizing bacteria**

337 *Brachypodium* TRL increased by 8.97% when plants were exposed to the P-/HA treatment compared to the P+  
 338 treatment ( $P=0.023$ , Fig. 4a-d). In comparison with the TRL measured in non-inoculated plants, the TRL of plants  
 339 inoculated with BveFZB42, Eco99B829 or Pfl29ARP decreased by 9.64%, 11.61% and 16.67% respectively,  
 340 whatever the nutritional context ( $P < 0.001$ , Fig. 4e). Mean values per treatment, standard deviation and coefficients  
 341 of ANOVAs are available in Online Resource 3.

342 The persistent homology analysis of the root systems was performed on 1<sup>st</sup> and 2<sup>nd</sup> order roots of non-inoculated  
 343 plants and plants inoculated with Pfl29ARP or BveFZB42, as those strains showed a strong impact on root biomass  
 344 accumulation (Fig. 5). Both PSB inoculation and P treatment had a significant impact on root system morphology  
 345 ( $P < 0.001$  and  $= 0.006$  respectively). Pairwise comparisons revealed that, on average, the morphology of plant root  
 346 systems inoculated with Pfl29ARP was different from those of non-inoculated plants and plants inoculated with  
 347 BveFZB42. Despite a significant impact of P treatment on root system morphology, pairwise comparisons did not  
 348 highlight the P treatments that differed from one another. The coefficients of the statistical analysis are available  
 349 in Online Resource 4.



350

351 **Fig. 4** Average total root length of four-week-old *Brachypodium* plantlets exposed to contrasted P supplies and  
 352 either inoculated or not inoculated with bacteria.  $n = 18$  for the P- and P+ treatments,  $n = 9$  for the P-/HA and P-  
 353 /TCP treatments. For each P treatment, the grand mean is shown by a dashed horizontal line. For each inoculation  
 354 treatment, large black-circled dots represent mean values, and shaded areas show the density distribution of each  
 355 population. Individuals are displayed as small grey-circled dots in the graphs. In panel e, values are means +/- 95%  
 356 confidence intervals calculated across P treatments



357

358 **Fig. 5** Multidimensional scaling plots displaying morphological differences between root systems, induced by P  
 359 (a) and inoculation (b) treatments. The Euclidean distance separating two branching structures (dots) on the plot  
 360 is a close representation of the true dissimilarity between these structures. 95% confidence ellipses for the centroids  
 361 are plotted for each treatment

362 **3.5 Low P availability induced lower shoot P concentration, even in the presence of P solubilizing**  
 363 **bacteria**

364 P concentration in the shoot of plants exposed to the P-, P-/HA and P-/TCP treatments was lower than in plants  
 365 exposed to P+ (-68.9%, -56.2% and -63.2% respectively;  $P < 0.001$ ; Fig. 6a-d). Plants grown under these three  
 366 treatments showed P deficiency symptoms, such as necrosis starting from the apex of mature leaves (Arvalis,  
 367 Institut du végétal). Inoculation with bacteria did not help the plants to increase the shoot P concentration, even in  
 368 the presence of the potentially mobilizable P sources TCP or HA (Fig. 6e). Mean values per treatment, standard  
 369 deviation and coefficients of ANOVAs are available in Online Resource 5.



370  
 371 **Fig. 6** Average shoot P concentration (a-e), P uptake efficiency “PUpE” (f-j), P utilization efficiency “PUtE” (k-  
 372 o) and physiological P use efficiency “PPUE” (p-t), of four-week-old *Brachypodium* plants grown under  
 373 contrasted P supplies and either inoculated or not inoculated with bacterial strains.  $n=6$  for the P- and P+  
 374 treatments,  $n=3$  for the P-/HA and P-/TCP treatments. For each P treatment, the grand mean is shown by a  
 375 dashed horizontal line. For each inoculation treatment, large black-circled dots represent mean values, and

376 shaded areas show the density distribution of each population. Individual data points (pool of 5 plantlets) are  
377 displayed as small grey-circled dots in the graphs. In panels e, j, o and t, values are means +/- 95% confidence  
378 intervals calculated across P treatments

379 **3.6 P supply and inoculation with Pfl29ARP impacted P use efficiency components in *Brachypodium***  
380 Regarding the PUpE (i.e. the ratio between shoot P content and applied soluble P), plants exposed to soluble P  
381 deficiency had a greater uptake efficiency ( $P < 0.001$ ), with the greatest values measured on plants grown in the  
382 presence of TCP and HA (883.5% and 1128.8% increase, respectively, compared to plants exposed to P+; Fig. 6f-  
383 i). *Brachypodium* acquired and accumulated a greater amount of P in shoots when TCP or HA were added to the  
384 nutrient solution, in comparison with the P- treatment and regardless of the bacterial treatment. Plants inoculation  
385 with Pfl29ARP led to lower PUpE values under all P treatments compared to non-inoculated plants (average  
386 decrease of 35.8% across all P treatments,  $P = 0.011$ , Fig. 6j).

387 Plants grown under soluble P deficiency were more efficient at utilizing P for biomass accumulation (PUtE,  
388 biomass produced by unit of plant P content;  $P < 0.001$ ; Fig. 6k-n). These plants accumulated more shoot biomass  
389 per unit of shoot P content compared to plants exposed to P+ condition. Plants grown under the P- treatment were  
390 globally the most efficient. Inoculation of *Brachypodium* by any of the bacterial strains had no significant impact  
391 on PUtE ( $P = 0.436$ , Fig. 6o).

392 The PPUE (i.e. shoot biomass divided by shoot P concentration), was significantly higher in plants grown under  
393 P-, P-/HA and P-/TCP conditions compared to plants exposed to sufficient P supply (81.8%, 49.1% and 80.1%  
394 increase respectively compared to P+ condition,  $P < 0.001$ , Fig. 6p-s). Plants exposed to a deficiency in soluble P  
395 produced shoot biomass more efficiently at lower shoot P concentration. The inoculation with Pfl29ARP induced  
396 a 19.9% reduction in PPUE compared to non-inoculated plants ( $P = 0.008$ , Fig. 6t). Mean values per treatment,  
397 standard deviation and coefficients of ANOVAs are available in Online Resource 5.

#### 398 **4 Discussion**

399 This study aimed to explore the impact of PSB inoculation on the response of *Brachypodium distachyon* Bd21 to  
400 contrasted P conditions. *Brachypodium* and the PSB were co-cultivated over four weeks in an *in vitro* gnotobiotic  
401 system and exposed to four different nutritional conditions: a low level of soluble P (P-); a low level of soluble P  
402 supplemented with poorly soluble forms of P (P-/TCP and P-/HA); and a high level of soluble P (P+). The plant  
403 biomass production and allocation, the root system architecture and the P use efficiency were studied.

#### 404 **4.1 *Brachypodium* shows developmental plasticity in response to contrasted P conditions**

405 Our study demonstrated that *Brachypodium* biomass accumulation is highly responsive to P supply, with lower  
406 shoot biomass but stable or greater root biomass accumulation under soluble P deficiency compared to high soluble  
407 P levels. The reduction in shoot biomass under soluble P deficiency was also reported in *Brachypodium* (Bd21-3)  
408 by Poiré et al. (2014) and *Dactylis glomerata* by Haling et al. (2016). Interestingly, a reduction in root biomass  
409 was observed in their studies, while our results showed no impact or even an increase in root biomass accumulation  
410 when plants were exposed to soluble P deficiency. The younger growth stage obtained in our confined  
411 experimental system could explain these results, as the stress was not as intense as it would have been under, for  
412 example, greenhouse conditions. Similarly to our results, Giles et al., (2017) showed a decrease in shoot dry weight  
413 and an increase in root dry weight in hydroponically grown barley under P deficiency. The stimulation of root  
414 development under low P conditions is a common reported response, facilitating the plant to explore the substrate

415 and take up P (Lynch et al., 2012). Nonetheless, it seems that both the growing conditions and the plant growth  
416 stage are important factors affecting biomass accumulation in response to P deficiency.

417 *Brachypodium* displayed different allometric trajectories under contrasted P conditions, showing responsiveness  
418 of the allocation pattern to the P supply. Plants grown in the presence of TCP or HA exhibited a higher shoot  
419 development per unit of root biomass than plants grown under the P- and P+ treatments. From this we can infer  
420 that the presence of unavailable but potentially mobilizable P sources induced a reduction of investment into the  
421 root compartment, in comparison with plants grown under P- conditions. Nevertheless, for similar root biomass,  
422 the shoot biomass was the highest in plants supplied with the P+ treatment compared to the three other treatments.  
423 We can hypothesize that stressed plants (P- conditions) maintained root development at the expense of the shoot  
424 compartment. This is confirmed by the greater RMF observed under soluble P limitation. On the contrary, when  
425 there was no nutrient limitation, there was no need for the plants to prioritize extension of their root systems and  
426 the plants maintained the biomass accumulation into the above-ground compartment. These results are in  
427 accordance with the “functional equilibrium model”, which states that a plant shifts allocation towards the organ  
428 involved in the acquisition of the most limiting resources (Brouwer 1963), and reveal a true plasticity in response  
429 to P supply. Contrasted results were found in previous studies about the allocation pattern in response to P nutrition.  
430 Some of them concluded in a “conservative response” of the plants adjusting their size rather than their allocation  
431 pattern (apparent plasticity; Müller et al. 2000). Others described an impact on the allocation pattern, but only  
432 under severe P stress (Rubio et al. 2013) or in interaction with nitrogen fertilisation (Sims et al. 2012). Plasticity  
433 of biomass allocation was also demonstrated, with a strong impact from the nutritional context (Poorter et al. 2012;  
434 Poorter and Nagel 2000; Shipley and Meziane 2002).

435 Regarding the root system, plants exposed to the P-/HA treatment exhibited a greater TRL. The observed root  
436 system lengthening was associated with greater root biomass and RMF for plants grown under P- conditions. These  
437 results are consistent with those of a hydroponics experiment on several barley varieties, which revealed a general  
438 trend towards root lengthening in response to P deficiency (Giles et al. 2017). On the other hand, Shen et al. (2018)  
439 reported that under moderate P stress, wheat plants maintained root length and reduced root biomass whereas  
440 under severe P stress both TRL and root biomass were reduced.

#### 441 **4.2 Despite their ability to solubilize tricalcium phosphate and hydroxyapatite, the bacterial inoculants** 442 **did not alleviate P deficiency stress in *Brachypodium* under the experimental growing conditions**

443 All the selected bacteria were able to solubilize the poorly available forms of P (TCP and HA) in NBRIP medium  
444 (Nautiyal 1999). HA, despite being reported as less soluble than TCP (Bashan et al. 2013, Havlin et al. 2014), was  
445 as easily solubilized as TCP. Some acidification of the medium was observed, with the best solubilizer strains  
446 acidifying the most. Medium acidification by proton release is the most straightforward P solubilization process  
447 (Bashan et al. 2013) and numerous studies have reported an acidification-associated P solubilization (Collavino et  
448 al. 2010; Fernández et al. 2012; Pereira and Castro 2014; Yu et al. 2011). The relationship between soluble P  
449 concentration and pH variation tended towards an intensification of P solubilization activity as the pH variation  
450 became stronger. This was more pronounced for HA than for TCP solubilization. This raises the hypothesis that  
451 HA solubilization mechanisms other than acidification are involved, such as complexing or chelating reactions  
452 (Bashan et al. 2013).



453 The use of PSB as bio-inoculants is increasingly reported in the literature, with interesting effects of microbial P  
454 mobilization on plant development and yield (Bakhshandeh et al. 2015; Li et al. 2017; Oteino et al. 2015; Pereira  
455 and Castro 2014), but few results have reported the inefficiency of *in vitro*-selected PSB to promote plant growth  
456 in the presence of poorly soluble forms of P (Collavino et al. 2010; Yu et al. 2011). In our study, the biomass  
457 accumulated in shoots and roots was reduced when plants were grown in the presence of bacteria. The strains  
458 Pfl29ARP and BveFZB42 had the strongest impact on plant development. Despite their ability to solubilize TCP  
459 and HA in NBRIP medium, the selected strains were not able to mobilize these poorly soluble forms of P under  
460 co-cultivation conditions and by this way alleviate P-starvation stress in *Brachypodium*. The soluble P  
461 concentration in the Hoagland solution at the end of the cultivation was below the detection limit of our analytical  
462 method for the P-, P-/TCP and P-/HA treatments (data not shown). A slight acidification of the nutrient solution  
463 was observed at the end of the co-cultivation in the presence of bacteria, but the pH remained within an acceptable  
464 range for plant development (data not shown). The available carbon source is of great importance for P  
465 solubilization by bacteria. Nico *et al.* (2012) reported a reduced P solubilization by bacteria unless glucose was  
466 added to the growing medium of rice. Soil experiments also resulted in the absence of beneficial effects of  
467 microbial consortia products on maize grown in a substrate with low organic matter content (Bradáčová et al.  
468 2019). Glucose is the most abundant sugar detected in *Brachypodium* exudates (Kawasaki et al. 2016). In our  
469 study, the bacterial strains were tested for P solubilization with glucose as the sole C source in NBRIP medium  
470 (Nautiyal 1999). During the co-cultivation experiment, the concentration of glucose provided through root  
471 exudates may have been too low to sustain the bacteria solubilization activity. As our gnotobiotic co-cultivation  
472 system was closed during the entire experiment duration, toxic bacterial metabolites may have accumulated in the  
473 system, leading to a repression of plant growth. Some studies have revealed a deleterious impact of inoculation  
474 with bacterial strains on plant growth under gnotobiotic conditions (Rybakova et al. 2016; Timmusk et al. 2015).  
475 The efficacy of a system to test for PSB activity in the presence of a host plant appears to be highly dependent on  
476 the considered organisms, but also on the co-cultivation conditions.

#### 477 **4.3 The plastic response of *Brachypodium* to P deficiency was modulated by inoculation with P** 478 **solubilizing bacteria**

479 Regarding the biomass allocation pattern, inoculation with PSB revealed an alteration of the plant's response to P  
480 conditions, except in the presence of HA. Under P- conditions, inoculation with PSB (except with BveFZB42) led  
481 to a reduced shoot productivity for similar root biomass. The same observation was made under the P-/TCP  
482 treatment, mainly with Pfl29ARP. The depletion in shoot growth benefited the root system, the development of  
483 which was either unaffected or less impacted than the shoot. This resulted in an increase in RMF. Under the P+  
484 treatment, investment into the root compartment was reduced in inoculated plants, except with AviF0819 and  
485 BveGB03. The RMF was still increased for the same reason as before: a repression of shoot biomass but a steady  
486 root biomass accumulation. As the root system is the place where the interaction with the bacteria occurs, it appears  
487 that the plant modulated the development of this interface of interaction depending on the nutritional context.  
488 These contrasted behaviours in *Brachypodium* should be explored more deeply. The complementarity between  
489 biomass partitioning (RMF) and allometric trajectories appears clearly here for the analysis of biomass allocation  
490 patterns under environmental variation. Both approaches should be considered when studying the impact of  
491 biostimulants on plant biomass allocation in response to environmental constraints.

492 The total root length of *Brachypodium* was significantly impacted by the P supply and inoculation with PSB.  
493 Regardless the P treatment, inoculation with BveFZB42, Eco99B829 and Pfl29ARP led to a reduction in TRL.  
494 These results contrast with others reported in the literature. Indeed, Talboys et al. (2014) demonstrated a root  
495 elongation promotion effect of BveFZB42 inoculation on wheat (through auxin production), in both low and high  
496 P-level soils. In a soil experiment, *Pseudomonas fluorescens* strains also exhibited a positive impact on wheat root  
497 elongation under contrasted P fertilisation (Zabihi et al. 2011). The persistent homology analysis performed in our  
498 study revealed that inoculation with Pfl29ARP impacted the morphology of the plant root system (considering 1<sup>st</sup>  
499 and 2<sup>nd</sup> order roots) in comparison with non-inoculated plants and plants inoculated with BveFZB42. The P  
500 conditions also induced changes in root system morphology, but these were less easily characterized. According  
501 to our results, *Brachypodium* showed a modification of root development, triggered by contrasted P supply and  
502 inoculation with bacteria. Geometrical and topological aspects of the root system architecture are important for  
503 nutrient foraging in soils. Both aspects are covered by the persistent homology analysis of the root system  
504 morphology. Thus, the methodological approaches used in this study appear suitable in seeking to characterize the  
505 plant's response to P supply and inoculation with PSB. This study did not consider root hairs, yet they constitute  
506 an important strategy for P nutrition (Lynch 2011) and should be further investigated.

#### 507 **4.4 Inoculation with P solubilizing bacteria did not improve *Brachypodium* P use efficiency under the** 508 **experimental growth conditions**

509 The shoot P concentration and PUE in *Brachypodium* were mainly affected by the P supply, but also by PSB  
510 inoculation to some extent. The shoot P concentration was the lowest in plants grown under P- conditions,  
511 confirming the P-deficient status of those plants. Despite the demonstrated ability of the bacterial strains to  
512 solubilize TCP and HA, they did not alleviate P deficiency in the plants. The soluble P concentration in the  
513 Hoagland solution at the end of the cultivation was null for the P-, P-/TCP and P-/HA treatments (data not shown).  
514 This result reinforces the above-mentioned hypothesis that the PSB did not extensively solubilize TCP and HA in  
515 our gnotobiotic conditions. On the other hand, the P+ solution contained enough soluble P after four weeks for  
516 avoiding nutritional stress in the plants (data not shown). Considering the slightly higher shoot P concentration in  
517 the presence of TCP and HA regardless the inoculation treatment, we assume that *Brachypodium* was able to partly  
518 solubilize those poorly soluble forms of P. Indeed, plants are able to acidify the rhizosphere and release organic  
519 anions, mobilizing poorly available P sources (Hinsinger et al. 2003; Wang and Lambers 2019). Citrate, malate,  
520 succinate, fumarate and oxalate were detected in *Brachypodium* root exudates (Kawasaki et al. 2016) and may be  
521 implied in P solubilization processes. The PUpE was significantly higher in plants exposed to soluble P deficiency  
522 compared to plants grown under the P+ treatment, as the stressed plants took up all the available soluble P and  
523 partly used it to build their shoots. The highest PUpE values were obtained in the presence of TCP and HA. This  
524 observation is consistent with the higher shoot P concentration observed under these treatments and reinforces the  
525 above-mentioned hypothesis of partial P solubilization by *Brachypodium*. The PUpE reduction in plants inoculated  
526 with Pfl29ARP is consistent with the observed decrease in shoot biomass accumulation, which impairs their P  
527 accumulation ability. The PUE was significantly higher under soluble P deficiency than under the P+ treatment,  
528 with the highest efficiency under the P- treatment. Therefore, stressed plants produced the largest biomass per unit  
529 of accumulated P. The inoculation of *Brachypodium* with bacteria did not impact the PUE, as expected from their  
530 poor P solubilization activity during the co-cultivation experiment. As observed for PUpE and PUE, the PPUE  
531 values were higher under soluble P deficiency, meaning that for similar shoot P concentration the stressed plants  
532 produced more shoot biomass. The inoculation with Pfl29ARP induced a reduction in PPUE. Indeed, shoot P

533 concentration was similar in non-inoculated plants and in plants inoculated with Pfl29ARP, but shoot biomass  
534 accumulation was reduced in inoculated plants.

## 535 **5 Conclusion**

536 The selected PSB efficiently solubilized TCP and HA in an *in vitro* liquid cultivation system. However, they did  
537 not alleviate P deficiency in *Brachypodium* under gnotobiotic co-cultivation conditions. Some negative impact of  
538 the PSB on plant biomass accumulation was even observed, probably due to inadequate carbon supply through  
539 root exudates or to the accumulation of bacterial toxic metabolites in the system. *Brachypodium* showed  
540 developmental plasticity in response to contrasted P conditions, prioritizing the development of the root  
541 compartment upon P starvation. Despite their inability to alleviate P deficiency, the selected PSB modulated  
542 *Brachypodium*'s response to P conditions by altering the plant allocation pattern and the root system development.  
543 Nevertheless, this modulation did not improve PUE in *Brachypodium* under our experimental conditions. This  
544 study highlights the necessity to select experimental conditions as close as possible to realistic conditions in the  
545 perspective of screening PSB for the purpose of using them as plant inoculants. Co-cultivation experiments are  
546 mandatory in order to confirm a beneficial interaction and test the related hypothesis. To our knowledge, this study  
547 represents the first time that allometry and persistent homology analyses were used to assess the impact of  
548 biostimulants on plant development under nutritional deficiency. They revealed to be convenient tools to study  
549 potential plasticity in biomass allocation or change in root system morphology. The plasticity in biomass allocation  
550 could be explored more deeply by considering a temporal perspective of the biomass allocation patterns; this would  
551 allow the experiment to cover a broader range of plant sizes and clearly assess the interaction between the use of  
552 biostimulants and varying nutrient supply. As root hairs are an important trait in nutrient acquisition, they deserve  
553 consideration in addition to root system architecture parameters, providing a more precise insight into root system  
554 plasticity in response to P supply and PSB inoculation. Integrating the proposed analyses and tools in future  
555 research would provide a better understanding of the impact of biostimulants on plant plasticity in a changing  
556 environment.

## 557 **6 Acknowledgments**

558 This research was supported by internal research funds of the University of Liège (Belgium). The authors are  
559 thankful to Florence Paquet for her technical support, Dr Yves Brostaux (Gembloux Agro-Bio Tech) for his  
560 constructive advice on statistical analyses and Guillaume Lobet (Forschungszentrum Juelich, Germany) for  
561 reviewing the manuscript.

562

563 **7 References**

564

565 Arvalis, Institut du Végétal. Carence en phosphore (P). [http://www.fiches.arvalis-](http://www.fiches.arvalis-infos.fr/fiche_accident/fiches_accidents.php?type_cul=3&id_acc=98)  
566 [infos.fr/fiche\\_accident/fiches\\_accidents.php?type\\_cul=3&id\\_acc=98](http://www.fiches.arvalis-infos.fr/fiche_accident/fiches_accidents.php?type_cul=3&id_acc=98) (accessed October 21<sup>st</sup> 2019)

567 Bakhshandeh E, Rahimian H, Pirdashti H, et al. (2015) Evaluation of phosphate-solubilizing bacteria on the  
568 growth and grain yield of rice (*Oryza sativa* L.) cropped in northern Iran. *J. Appl. Microbiol.* 119(5):1371–1382.

569 Bashan Y, Kamnev A. a. and de-Bashan LE (2013) Tricalcium phosphate is inappropriate as a universal selection  
570 factor for isolating and testing phosphate-solubilizing bacteria that enhance plant growth: A proposal for an  
571 alternative procedure. *Biol. Fertil. Soils* 49(4):465–479.

572 Bradáčová K, Sittinger M, Tietz K, et al. (2019) Maize Inoculation with Microbial Consortia : Contrasting E ff  
573 ects on Rhizosphere Activities , Nutrient Acquisition and Early Growth in Di ff erent Soils. *Microorganisms*  
574 329(7):1–16.

575 Brouwer R (1963) Some aspects of the equilibrium between overground and underground plant parts. *Jaarb. van*  
576 *het Inst. voor Biol. en Scheikd. Onderz. van Landbouwgewassen* 1963:31–39.

577 Collavino MM, Sansberro PA, Mroginski LA, et al. (2010) Comparison of in vitro solubilization activity of  
578 diverse phosphate-solubilizing bacteria native to acid soil and their ability to promote *Phaseolus vulgaris* growth.  
579 *Biol. Fertil. Soils* 46(7):727–738.

580 Cooper J, Lombardi R, Boardman D, et al. (2011) The future distribution and production of global phosphate  
581 rock reserves. *Resour. Conserv. Recycl.* 57(January):78–86.

582 Cordell D, Drangert J-O and White S (2009) The story of phosphorus: Global food security and food for thought.  
583 *Glob. Environ. Chang.* 19(2):292–305.

584 Cordell D and White S (2011) Peak phosphorus: Clarifying the key issues of a vigorous debate about long-term  
585 phosphorus security. *Sustainability* 3(10):2027–2049.

586 Delaplace P, Delory BM, Baudson C, et al. (2015) Influence of rhizobacterial volatiles on the root system  
587 architecture and the production and allocation of biomass in the model grass *Brachypodium distachyon* (L.) P.  
588 Beauv. *BMC Plant Biol.* 15:195.

589 Delory BM, Baudson C, Brostaux Y, et al. (2016) archiDART: an R package for the automated computation of  
590 plant root architectural traits. *Plant Soil* 398(1–2):351–365.

591 Delory BM, Weidlich EWA, Meder L, et al. (2017) Accuracy and bias of methods used for root length  
592 measurements in functional root research. *Methods Ecol. Evol.* 8:1594–1606.

593 Delory BM, Li M, Topp CN, et al. (2018) archiDART v3.0: A new data analysis pipeline allowing the  
594 topological analysis of plant root systems. *F1000Research* 7(0):22.

595 du Jardin P (2015) Plant biostimulants: Definition, concept, main categories and regulation. *Sci. Hortic.* 196:3–  
596 14.

597 European Commission (2014) Communication from the Commission: On the review of the list of critical raw  
598 materials for the EU and the implementation of the Raw Materials. Initiative COM(2014) 297 final.

599 European Parliament and Council of the EU (2019) Regulation 2019/1009 of 5 June 2019 laying down rules on  
600 the making available on the market of EU fertilising products and amending Regulations (EC) No 1069/2009  
601 and (EC) No 1107/2009 and repealing Regulation (EC) No 2003/2003. *Official Journal of the European Union.*  
602 25.06.2019.

603 Fernández L, Agaras B, Zalba P, et al. (2012) *Pseudomonas* spp. isolates with high phosphate-mobilizing  
604 potential and root colonization properties from agricultural bulk soils under no-till management. *Biol. Fertil.*  
605 *Soils* 48:763–773.

606 Giles CD, Hsu P-C (Lisa), Richardson AE, et al. (2014) Plant assimilation of phosphorus from an insoluble  
607 organic form is improved by addition of an organic anion producing *Pseudomonas* sp. *Soil Biol. Biochem.*

- 608 68:263–269.
- 609 Giles CD, Brown LK, Adu MO, et al. (2017) Response-based selection of barley cultivars and legume species  
610 for complementarity: Root morphology and exudation in relation to nutrient source. *Plant Sci.* 255:12–28.
- 611 Goh CH, Veliz Vallejos DF, Nicotra AB, et al. (2013) The Impact of Beneficial Plant-Associated Microbes on  
612 Plant Phenotypic Plasticity. *J. Chem. Ecol.* 39(7):826–839.
- 613 Haling RE, Yang Z, Shadwell N, et al. (2016) Growth and root dry matter allocation by pasture legumes and a  
614 grass with contrasting external critical phosphorus requirements. *Plant Soil* 407:67–79.
- 615 Havlin JL, Tisdale SL, Nelson WL, et al. (2013) Soil fertility and Fertilizers. An introduction to nutrient  
616 management. Pearson (8<sup>th</sup> Edition). 528p.
- 617 Haygarth PM, Jarvie HP, Powers SM, et al. (2014) Sustainable Phosphorus Management and the Need for a  
618 Long-Term Perspective: The Legacy Hypothesis. *Environ. Sci. Technol.* 48:8417–8419.
- 619 Hinsinger P, Plassard C, Tang C, et al. (2003) Origins of root-mediated pH changes in the rhizosphere and their  
620 responses to environmental constraints: A review. *Plant Soil* 248(1–2):43–59.
- 621 Hothorn T, Bretz F and Westfall P (2008) Simultaneous Inference in General Parametric Models. *Biometrical*  
622 *Journal* 50(3): 346-363.
- 623 Idris EE, Iglesias DJ, Talon M, et al. (2007) Tryptophan-Dependent Production of Indole-3-Acetic Acid (IAA)  
624 Affects Level of Plant Growth Promotion by *Bacillus amyloliquefaciens* FZB42. *Mol. Plant-Microbe Interact.*  
625 20(6):619–626.
- 626 Idriss EE, Makarewicz O, Farouk A, et al. (2002) Extracellular phytase activity of *Bacillus amyloliquefaciens*  
627 FZB45 contributes to its plant-growth-promoting effect. *Microbiol. (United Kingdom)* 2097–2109.
- 628 Kawasaki A, Donn S, Ryan PR, et al. (2016) Microbiome and exudates of the root and rhizosphere of  
629 brachypodium distachyon, a model for wheat. *PLoS One* 11(10).
- 630 Li Y, Liu X, Hao T, et al. (2017) Colonization and Maize Growth Promotion Induced by Phosphate Solubilizing  
631 Bacterial Isolates. *Int. J. Mol. Sci.* 18:1253.
- 632 Liu Z, Li YC, Zhang S, et al. (2015) Characterization of phosphate-solubilizing bacteria isolated from calcareous  
633 soils. *Appl. Soil Ecol.* 96:217–224.
- 634 Lobet G, Paez-Garcia A, Schneider H, et al. (2019) Demystifying roots: A need for clarification and extended  
635 concepts in root phenotyping. *Plant Sci.* 282(September 2017):11–13.
- 636 Lobet G, Pagès L and Draye X (2011) A Novel Image-Analysis Toolbox Enabling Quantitative Analysis of Root  
637 System Architecture. *Plant Physiol.* 157(1):29–39.
- 638 Lynch J, Marschner P and Rengel Z (2012) Effect of Internal and External Factors on Root Growth and  
639 Development. *Marschner’s Miner. Nutr. High. Plants.* Elsevier Ltd.
- 640 Lynch JP (2011) Root Phenotypes for Enhanced Soil Exploration and Phosphorus Acquisition: Tools for Future  
641 Crops. *Plant Physiol.* 156(3):1041–1049.
- 642 Menezes-Blackburn D, Giles C, Darch T, et al. (2018) Opportunities for mobilizing recalcitrant phosphorus from  
643 agricultural soils: a review. *Plant Soil* 427(1–2):5–16.
- 644 Müller I, Schmid B and Weiner J (2000) The effect of nutrient availability on biomass allocation patterns in 27  
645 species of herbaceous plants. *Perspect. Plant Ecol. Evol. Syst.* 3(2):115–127.
- 646 Murphy J and Riley JP (1962) A Modified Single Solution Method for the Determination of Phosphate in  
647 Natural Waters. *Anal. Chim. Acta* 27:31–36.
- 648 Myresiotis CK, Vryzas Z and Papadopoulou-Mourkidou E (2015) Effect of specific plant-growth-promoting  
649 rhizobacteria (PGPR) on growth and uptake of neonicotinoid insecticide thiamethoxam in corn (*Zea mays* L.)  
650 seedlings. *Pest Manag. Sci.* 71(9):1258–1266.
- 651 Nautiyal CS (1999) An efficient microbiological growth medium for screening phosphate solubilizing  
652 microorganisms. *FEMS Microbiol. Lett.* 170:265–270.

- 653 Neto AP, Favarin JL, Hammond JP, et al. (2016) Analysis of Phosphorus Use Efficiency Traits in Coffea  
654 Genotypes Reveals Coffea arabica and Coffea canephora Have Contrasting Phosphorus Uptake and Utilization  
655 Efficiencies. *Front. Plant Sci.* 7(March):408.
- 656 Nico M, Ribaudó CM, Gori JI, et al. (2012) Uptake of phosphate and promotion of vegetative growth in glucose-  
657 exuding rice plants (*Oryza sativa*) inoculated with plant growth-promoting bacteria. *Appl. Soil Ecol.* 61:190–  
658 195.
- 659 Nicotra AB, Atkin OK, Bonser SP, et al. (2010) Plant phenotypic plasticity in a changing climate. *Trends Plant*  
660 *Sci.* 15(12):684–692.
- 661 Nosrati R, Owlia P, Saderi H, et al. (2014) Phosphate solubilization characteristics of efficient nitrogen fixing  
662 soil *Azotobacter* strains. *Iran. J. Microbiol.* 6(4):285–295.
- 663 Oksanen J, Blanchet FG, Friendly M, et al. (2019) vegan: Community Ecology Package. R package version 2.5-  
664 4. <https://CRAN.R-project.org/package=vegan>
- 665 Oteino N, Lally RD, Kiwanuka S, et al. (2015) Plant growth promotion induced by phosphate solubilizing  
666 endophytic *Pseudomonas* isolates. *Front. Microbiol.* 6:745.
- 667 Owen D, Williams AP, Griffith GW, et al. (2015) Use of commercial bio-inoculants to increase agricultural  
668 production through improved phosphorus acquisition. *Appl. Soil Ecol.* 86:41–54.
- 669 Pereira SIA and Castro PML (2014) Phosphate-solubilizing rhizobacteria enhance *Zea mays* growth in  
670 agricultural P-deficient soils. *Ecol. Eng.* 73:526–535.
- 671 Pierret A, Gonkhamdee S, Jourdan C, et al. (2013) IJ\_Rhizo: An open-source software to measure scanned  
672 images of root samples. *Plant Soil* 373(1–2):531–539.
- 673 Poiré R, Chochois V, Sirault XRR, et al. (2014) Digital imaging approaches for phenotyping whole plant  
674 nitrogen and phosphorus response in *Brachypodium distachyon*. *J. Integr. Plant Biol.* 56(8):781–96.
- 675 Poorter H, Niklas KJ, Reich PB, et al. (2012) Biomass allocation to leaves, stems and roots: meta-analyses of  
676 interspecific variation and environmental control. *New Phytol.* 193:30–50.
- 677 Poorter H and Nagel O (2000) The role of biomass allocation in the growth response of plants to different levels  
678 of light, CO<sub>2</sub>, nutrients and water: a quantitative review. *Aust. J. Plant Physiol.* 27:595–607.
- 679 R Core Team (2018) R: A language and environment for statistical computing. R Foundation for Statistical  
680 Computing, Vienna, Austria. URL <https://www.R-project.org/>
- 681 Richardson AE, Lynch JP, Ryan PR, et al. (2011) Plant and microbial strategies to improve the phosphorus  
682 efficiency of agriculture. *Plant Soil* 349:121–156.
- 683 Rowe H, Withers PJA, Baas P, et al. (2016) Integrating legacy soil phosphorus into sustainable nutrient  
684 management strategies for future food, bioenergy and water security. *Nutr. Cycl. Agroecosystems* 104(3):393–  
685 412.
- 686 Rubio G, Gutierrez Boem FH and Fernández MC (2013) Severe phosphorus stress affects sunflower and maize  
687 but not soybean root to shoot allometry. *Agron. J.* 105(5):1283–1288.
- 688 Rybakova D, Schmuck M, Wetzlinger U, et al. (2016) Kill or cure? The interaction between endophytic  
689 *Paenibacillus* and *Serratia* strains and the host plant is shaped by plant growth conditions. *Plant Soil* 405:65–79.
- 690 Sattari SZ, Bouwman AF, Giller KE, et al. (2012) Residual soil phosphorus as the missing piece in the global  
691 phosphorus crisis puzzle. *Proc. Natl. Acad. Sci. U. S. A.* 109(16):6348–6353.
- 692 Schmid B (1992) Phenotypic variation in plants. *Evol. Trends Plants.* 6(1):45–60.
- 693 Schneider CA, Rasband WS and Eliceiri KW (2012) NIH Image to ImageJ: 25 years of image analysis. *Nat.*  
694 *Methods* 9(7):671–5.
- 695 Shaharoon B, Naveed M, Arshad M, et al. (2008) Fertilizer-dependent efficiency of *Pseudomonas* for  
696 improving growth, yield, and nutrient use efficiency of wheat (*Triticum aestivum* L.). *Appl. Microbiol.*  
697 *Biotechnol.* 79(1):147–155.
- 698 Shen J, Yuan L, Zhang J, et al. (2011) Phosphorus Dynamics: From Soil to Plant. *Plant Physiol.* 156(3):997–

- 699 1005.
- 700 Shen Q, Wen Z, Dong Y, et al. (2018) The responses of root morphology and phosphorus-mobilizing exudations  
701 in wheat to increasing shoot phosphorus concentration. *AoB Plants*. 10(5).
- 702 Shipley B and Meziane D (2002) The balanced-growth hypothesis and the allometry of leaf and root biomass  
703 allocation. *Funct. Ecol.* 16(3):326–331.
- 704 Sims L, Pastor J, Lee T, et al. (2012) Nitrogen, phosphorus and light effects on growth and allocation of biomass  
705 and nutrients in wild rice. *Oecologia* 170(1):65–76.
- 706 Talboys PJ, Owen DW, Healey JR, et al. (2014) Auxin secretion by *Bacillus amyloliquefaciens* FZB42 both  
707 stimulates root exudation and limits phosphorus uptake in *Triticum aestivum*. *BMC Plant Biol.* 14:51.
- 708 Taller BJ and Wong T (1989) Medium Cytokinins in *Azotobacter vinelandii* Culture Medium. *Appl. Environ.*  
709 *Microbiol.* 55(1):266–268.
- 710 Timmusk S, Kim S Bin, Nevo E, et al. (2015) Sfp-type PPTase inactivation promotes bacterial biofilm formation  
711 and ability to enhance wheat drought tolerance. *Front. Microbiol.* 6:387.
- 712 van Dijk KC, Lesschen JP and Oenema O (2016) Phosphorus flows and balances of the European Union  
713 Member States. *Sci. Total Environ.* 542:1078–1093.
- 714 Wang Y and Lambers H (2019) Root-released organic anions in response to low phosphorus availability: recent  
715 progress, challenges and future perspectives. *Plant Soil* <https://doi.org/10.1007/s11104-019-03972-8>.
- 716 Warton DI, Wright IJ, Falster DS, et al. (2006) Bivariate line-fitting methods for allometry. *Biol. Rev. Camb.*  
717 *Philos. Soc.* 81(2):259–291.
- 718 Warton DI, Duursma RA, Falster DS, et al. (2012) smatr 3- an R package for estimation and inference about  
719 allometric lines. *Methods Ecol. Evol.* 3(2):257–259.
- 720 Weiner J (2004) Allocation, plasticity and allometry in plants. *Perspect. Plant Ecol. Evol. Syst.* 6/4:207–215.
- 721 Wickham H (2016) *ggplot2: Elegant Graphics for Data Analysis*. Springer-Verlag New York, 2016.
- 722 Wu YN, Feng YL, Paré PW, et al. (2016) Beneficial soil microbe promotes seed germination, plant growth and  
723 photosynthesis in herbal crop *Codonopsis pilosula*. *Crop Pasture Sci.* 67(1):91–98.
- 724 Xie JB, Xu GQ, Jenerette GD, et al. (2015) Apparent plasticity in functional traits determining competitive  
725 ability and spatial distribution: A case from desert. *Sci. Rep.* 5(July):1–18.
- 726 Yu X, Liu X, Zhu TH, et al. (2011) Isolation and characterization of phosphate-solubilizing bacteria from walnut  
727 and their effect on growth and phosphorus mobilization. *Biol. Fertil. Soils* 47(4):437–446.
- 728 Zabihi HR, Savaghebi GR, Khavazi K, et al. (2011) *Pseudomonas* bacteria and phosphorous fertilization,  
729 affecting wheat (*Triticum aestivum* L.) yield and P uptake under greenhouse and field conditions. *Acta Physiol.*  
730 *Plant.* 33:145–152.
- 731 Zhang JL, Aziz M, Qiao Y, et al. (2014) Soil microbe *Bacillus subtilis* (GB03) induces biomass accumulation  
732 and salt tolerance with lower sodium accumulation in wheat. *Crop Pasture Sci.* 65(5):423–427.
- 733 Zhou D, Huang XF, Chaparro JM, et al. (2016) Root and bacterial secretions regulate the interaction between  
734 plants and PGPR leading to distinct plant growth promotion effects. *Plant Soil* 401(1–2):259–272.
- 735

736 **Online Resource 1** Biomass accumulation and RMF of four-week-old *Brachypodium* plantlets grown in Magenta  
 737 boxes, exposed to contrasted P supplies and either inoculated or not inoculated with bacterial strains (n=30 for the  
 738 P- and P+ treatments, n=15 for the P-/TCP and P-/HA treatments). Results of 3-way ANOVAs (degree of freedom  
 739 “df”, *P* and *F* values) and Dunnett’s *post hoc* tests (annotated with stars; P+ and non-inoculated treatments used  
 740 as references)

|                              | Shoot biomass (mg)                              |       | Root biomass (mg)                               |       | Total biomass (mg)                              |       | RMF                                             |      |
|------------------------------|-------------------------------------------------|-------|-------------------------------------------------|-------|-------------------------------------------------|-------|-------------------------------------------------|------|
|                              | mean                                            | sd    | mean                                            | Sd    | mean                                            | sd    | mean                                            | sd   |
| <i>P treatment</i>           |                                                 |       |                                                 |       |                                                 |       |                                                 |      |
| P-                           | 78.65 *                                         | 17.53 | 57.78 *                                         | 13.43 | 136.43 *                                        | 27.98 | 0.42                                            | 0.05 |
| P-/HA                        | 92.09 *                                         | 29.20 | 51.25                                           | 11.08 | 143.34 *                                        | 35.52 | 0.37                                            | 0.06 |
| P-/TCP                       | 89.56 *                                         | 23.15 | 51.59                                           | 11.75 | 141.25 *                                        | 31.30 | 0.37                                            | 0.06 |
| P+                           | 138.25                                          | 33.14 | 51.00                                           | 12.81 | 188.90                                          | 41.99 | 0.27                                            | 0.04 |
| ANOVA                        | df=3, <i>P</i> <2.2e-16,<br><i>F</i> =188.9276  |       | df=3, <i>P</i> =4.278e-07,<br><i>F</i> =11.1453 |       | df=3, <i>P</i> <2.2e-16,<br><i>F</i> =84.2410   |       | df= 3, <i>P</i> <2.2e-16,<br><i>F</i> =313.3280 |      |
| <i>Inoculation treatment</i> |                                                 |       |                                                 |       |                                                 |       |                                                 |      |
| Non-inoculated               | 112.05                                          | 36.78 | 55.02                                           | 14.04 | 167.07                                          | 41.82 | 0.34                                            | 0.08 |
| AviF0819                     | 108.42                                          | 39.08 | 56.00                                           | 13.06 | 164.42                                          | 44.44 | 0.35                                            | 0.08 |
| BveFZB42                     | 100.46 *                                        | 32.72 | 49.42 *                                         | 12.10 | 149.88 *                                        | 39.84 | 0.34                                            | 0.06 |
| BveGB03                      | 107.84                                          | 38.83 | 54.49                                           | 12.45 | 162.33                                          | 42.21 | 0.35                                            | 0.09 |
| Eco99B829                    | 103.56                                          | 34.44 | 54.28                                           | 11.58 | 156.97                                          | 35.83 | 0.36                                            | 0.08 |
| Pfl29ARP                     | 83.48 *                                         | 32.72 | 51.33                                           | 13.27 | 134.81 *                                        | 39.88 | 0.39                                            | 0.08 |
| ANOVA                        | df=5, <i>P</i> =8.956e-16,<br><i>F</i> =17.2350 |       | df=5, <i>P</i> =0.002956,<br><i>F</i> =3.6519   |       | df=5, <i>P</i> =3.476e-11,<br><i>F</i> =12.2019 |       | df=5, <i>P</i> =2.356e-15,<br><i>F</i> =16.7725 |      |
| <i>Repetition</i>            |                                                 |       |                                                 |       |                                                 |       |                                                 |      |
| ANOVA                        | df=1, <i>P</i> =0.2585,<br><i>F</i> =1.2795     |       | df=1, <i>P</i> =0.013298,<br><i>F</i> =6.1721   |       | df=1, <i>P</i> =0.1091,<br><i>F</i> =2.5765     |       | df=1, <i>P</i> =0.2085544,<br><i>F</i> =1.5855  |      |
| <i>Interaction</i>           |                                                 |       |                                                 |       |                                                 |       |                                                 |      |
| P- non-inoculated            | 88.84                                           | 15.04 | 60.01                                           | 11.97 | 148.86                                          | 22.02 | 0.40                                            | 0.06 |
| P- AviF0819                  | 83.13                                           | 15.56 | 61.05                                           | 12.06 | 144.18                                          | 25.07 | 0.42                                            | 0.04 |
| P- BveFZB42                  | 80.21                                           | 19.12 | 51.28                                           | 13.53 | 131.49                                          | 31.51 | 0.39                                            | 0.03 |
| P- BveGB03                   | 79.81                                           | 13.45 | 61.35                                           | 10.44 | 141.16                                          | 21.41 | 0.43 *                                          | 0.04 |
| P- Eco99B829                 | 75.62                                           | 14.65 | 59.99                                           | 14.23 | 135.61                                          | 26.00 | 0.44 *                                          | 0.05 |
| P- Pfl29ARP                  | 64.34                                           | 17.60 | 53.11                                           | 15.08 | 117.44                                          | 30.64 | 0.45 *                                          | 0.05 |
| P-/HA non-inoculated         | 100.09                                          | 25.94 | 55.54                                           | 13.70 | 155.62                                          | 31.15 | 0.36                                            | 0.08 |
| P-/HA AviF0819               | 83.17                                           | 23.63 | 50.40                                           | 13.22 | 133.57                                          | 32.78 | 0.38                                            | 0.06 |
| P-/HA BveFZB42               | 87.99                                           | 26.38 | 48.61                                           | 10.86 | 136.61                                          | 32.44 | 0.36                                            | 0.06 |
| P-/HA BveGB03                | 101.44                                          | 35.68 | 49.55                                           | 9.45  | 150.99                                          | 40.80 | 0.34                                            | 0.07 |
| P-/HA Eco99B829              | 101.27                                          | 32.89 | 54.15                                           | 8.14  | 155.43                                          | 37.93 | 0.36                                            | 0.06 |
| P-/HA Pfl29ARP               | 78.59                                           | 24.21 | 49.23                                           | 9.98  | 127.83                                          | 32.08 | 0.40                                            | 0.06 |
| P-/TCP non-inoculated        | 94.26                                           | 26.26 | 51.83                                           | 11.63 | 146.09                                          | 36.12 | 0.36                                            | 0.04 |
| P-/TCP AviF0819              | 96.39                                           | 19.21 | 53.53                                           | 11.80 | 149.92                                          | 27.51 | 0.36                                            | 0.06 |
| P-/TCP BveFZB42              | 93.72                                           | 20.98 | 48.94                                           | 11.43 | 142.65                                          | 29.81 | 0.34                                            | 0.04 |
| P-/TCP BveGB03               | 90.40                                           | 24.71 | 53.77                                           | 14.86 | 144.16                                          | 37.03 | 0.37                                            | 0.04 |
| P-/TCP Eco99B829             | 97.48                                           | 17.70 | 49.70                                           | 7.81  | 148.43                                          | 23.06 | 0.34                                            | 0.04 |
| P-/TCP Pfl29ARP              | 65.7                                            | 14.42 | 51.70                                           | 12.92 | 117.40                                          | 23.81 | 0.44 *                                          | 0.05 |
| P+ non-inoculated            | 150.13                                          | 31.20 | 51.36                                           | 16.15 | 201.49                                          | 43.82 | 0.25                                            | 0.05 |
| P+ AviF0819                  | 152.36                                          | 30.56 | 54.98                                           | 13.41 | 207.34                                          | 40.21 | 0.26                                            | 0.04 |
| P+ BveFZB42                  | 130.30                                          | 30.35 | 48.21                                           | 11.87 | 178.51                                          | 40.32 | 0.27                                            | 0.03 |
| P+ BveGB03                   | 147.60                                          | 30.07 | 50.53                                           | 11.90 | 198.13                                          | 38.98 | 0.25                                            | 0.04 |
| P+ Eco99B829                 | 135.48                                          | 28.99 | 50.50                                           | 9.14  | 183.69                                          | 32.12 | 0.28                                            | 0.04 |
| P+ Pfl29ARP                  | 113.97                                          | 32.82 | 50.40                                           | 13.33 | 164.36                                          | 42.14 | 0.31 *                                          | 0.05 |
| ANOVA                        | df=15, <i>P</i> =0.1269,<br><i>F</i> =1.4330    |       | df=15, <i>P</i> =0.735267,<br><i>F</i> =0.7482  |       | df=15, <i>P</i> =0.6874,<br><i>F</i> =0.7917    |       | df=15, <i>P</i> =0.0004245,<br><i>F</i> =2.7517 |      |

741



742 **Online Resource 2** Coefficients, R<sup>2</sup> and P value of SMA lines (n=30 for the P- and P+ treatments, n=15 for the  
 743 P-/HA and P-/TCP treatments), results of covariance analysis for differences among SMA lines coefficients  
 744 (degree of freedom “df”, P and likelihood ratio test “LR” values). If no significant difference was noticed between  
 745 slopes, a common slope was used to test for difference in elevation. Treatments without any common letter are  
 746 significantly different from each other (pairwise comparison)

|                       | elevation                      | slope                        | R <sup>2</sup> | P         |
|-----------------------|--------------------------------|------------------------------|----------------|-----------|
| <i>Non-inoculated</i> |                                |                              |                |           |
| P-                    |                                |                              |                |           |
| Non-inoculated        | 0.51                           | 0.81 <i>ab</i>               | 0.090          | 0.10762   |
| AviF0819              | -0.08                          | 1.19 <i>a</i>                | 0.072          | 0.33277   |
| BveFZB42              | 0.00                           | 1.15 <i>a</i>                | 0.668          | 0.00019   |
| BveGB03               | 1.15                           | 0.60 <i>b</i>                | 0.399          | 0.00018   |
| Eco99B829             |                                |                              |                |           |
| Pfl29ARP              |                                |                              |                |           |
| Covariance analysis   | /                              | df= 3,<br>P=0.020606,        |                |           |
| <i>P-</i>             |                                |                              |                |           |
| Non-inoculated        | 0.38 <i>ab</i>                 |                              | 0.090          | 0.10762   |
| AviF0819              | 0.34 <i>bc</i>                 |                              | 0.468          | 3.0804e-5 |
| BveFZB42              | 0.39 <i>a</i>                  | 0.88                         | 0.718          | 3.5339e-9 |
| BveGB03               | 0.32 <i>cd</i>                 |                              | 0.460          | 5.3114e-5 |
| Eco99B829             | 0.31 <i>cd</i>                 |                              | 0.411          | 0.00013   |
| Pfl29ARP              | 0.28 <i>d</i>                  |                              | 0.604          | 4.3258e-7 |
| Covariance analysis   | df=5, P=2.4697e-9,<br>LR=48.77 | df=5, P=0.75661,<br>LR=2.631 |                |           |
| <i>P-/HA</i>          |                                |                              |                |           |
| Non-inoculated        | -0.71                          |                              | 0.072          | 0.33277   |
| AviF0819              | -0.73                          |                              | 0.394          | 0.01228   |
| BveFZB42              | -0.69                          | 1.56                         | 0.264          | 0.05028   |
| BveGB03               | -0.65                          |                              | 0.227          | 0.07242   |
| Eco99B829             | -0.71                          |                              | 0.384          | 0.01371   |
| Pfl29ARP              | -0.75                          |                              | 0.582          | 0.00093   |
| Covariance analysis   | df=5, P=0.43264,<br>LR=4.865   | df=5, P=0.17355,<br>LR=7.7   |                |           |
| <i>P-/TCP</i>         |                                |                              |                |           |
| Non-inoculated        | 0.23 <i>ab</i>                 |                              | 0.668          | 0.00019   |
| AviF0819              | 0.23 <i>ab</i>                 |                              | 0.249          | 0.05839   |
| BveFZB42              | 0.25 <i>ab</i>                 | 1.02                         | 0.513          | 0.00269   |
| BveGB03               | 0.19 <i>b</i>                  |                              | 0.630          | 0.00069   |
| Eco99B829             | 0.27 <i>a</i>                  |                              | 0.339          | 0.03689   |
| Pfl29ARP              | 0.08 <i>c</i>                  |                              | 0.419          | 0.00905   |
| Covariance analysis   | df=5, P=4.4342e-7,<br>LR=37.65 | df=5, P=0.83515,<br>LR=2.1   |                |           |
| <i>P+</i>             |                                |                              |                |           |
| Non-inoculated        | 1.15                           | 0.60 <i>c</i>                | 0.399          | 0.00018   |
| AviF0819              | 0.93                           | 0.72 <i>bc</i>               | 0.312          | 0.00132   |
| BveFZB42              | 0.45                           | 0.99 <i>ab</i>               | 0.621          | 2.3175e-7 |
| BveGB03               | 0.79                           | 0.81 <i>bc</i>               | 0.512          | 1.2825e-5 |
| Eco99B829             | 0.17                           | 1.15 <i>a</i>                | 0.312          | 0.00165   |
| Pfl29ARP              | 0.10                           | 1.15 <i>a</i>                | 0.529          | 5.3439e-6 |
| Covariance analysis   | /                              | df=5, P=0.00842,<br>LR=15.5  |                |           |

747

748

749 **Online Resource 3** TRL of four-week-old *Brachypodium* plantlets grown in Magenta boxes, exposed to  
 750 contrasted P supplies and either inoculated or not inoculated with bacterial strains (n=18 for the P- and P+  
 751 treatments, n=9 for the P-/HA and P-/TCP treatments). Results of 3-way ANOVAs (degree of freedom “df”, *P*  
 752 and *F* values) and Dunnett’s *post hoc* tests (annotated with stars; P+ and non-inoculated treatments used as  
 753 references)

|                              | TRL (cm)                                   |       |
|------------------------------|--------------------------------------------|-------|
|                              | mean                                       | sd    |
| <i>P treatment</i>           |                                            |       |
| P-                           | 224.58                                     | 42.78 |
| P-/HA                        | 233.06*                                    | 42.37 |
| P-/TCP                       | 213.26                                     | 49.83 |
| P+                           | 213.87                                     | 46.39 |
| ANOVA                        | df=3, <i>P</i> =0.02126, <i>F</i> =3.2821  |       |
| <i>Inoculation treatment</i> |                                            |       |
| Non-inoculated               | 237.85                                     | 48.83 |
| AviF0819                     | 228.11                                     | 42.30 |
| BveFZB42                     | 214.92*                                    | 50.62 |
| BveGB03                      | 233.41                                     | 40.92 |
| Eco99B829                    | 213.11*                                    | 35.64 |
| Pfl29ARP                     | 195.82*                                    | 41.59 |
| ANOVA                        | df=5, <i>P</i> =1.99e-06, <i>F</i> =7.2513 |       |
| <i>Repetition</i>            |                                            |       |
| ANOVA                        | df=1, <i>P</i> =0.07758, <i>F</i> =3.1363  |       |
| <i>Interaction</i>           |                                            |       |
| P- non-inoculated            | 252.83                                     | 40.23 |
| P- AviF0819                  | 239.12                                     | 33.89 |
| P- BveFZB42                  | 214.76                                     | 49.38 |
| P- BveGB03                   | 234.62                                     | 31.18 |
| P- Eco99B829                 | 218.86                                     | 26.65 |
| P- Pfl29ARP                  | 187.32                                     | 42.97 |
| P-/HA non-inoculated         | 257.96                                     | 31.15 |
| P-/HA AviF0819               | 219.12                                     | 39.79 |
| P-/HA BveFZB42               | 231.37                                     | 40.44 |
| P-/HA BveGB03                | 235.36                                     | 49.72 |
| P-/HA Eco99B829              | 248.26                                     | 45.64 |
| P-/HA Pfl29ARP               | 206.27                                     | 33.97 |
| P-/TCP non-inoculated        | 198.82                                     | 76.65 |
| P-/TCP AviF0819              | 221.07                                     | 38.39 |
| P-/TCP BveFZB42              | 224.41                                     | 61.96 |
| P-/TCP BveGB03               | 222.32                                     | 51.99 |
| P-/TCP Eco99B829             | 207.66                                     | 28.38 |
| P-/TCP Pfl29ARP              | 205.30                                     | 33.29 |
| P+ non-inoculated            | 232.32                                     | 36.08 |
| P+ AviF0819                  | 225.11                                     | 52.78 |
| P+ BveFZB42                  | 202.13                                     | 51.09 |
| P+ BveGB03                   | 236.76                                     | 41.63 |
| P+ Eco99B829                 | 192.52                                     | 27.13 |
| P+ Pfl29ARP                  | 194.36                                     | 47.95 |
| ANOVA                        | df=15, <i>P</i> =0.15092, <i>F</i> =1.3891 |       |

754

755

756 **Online Resource 4** Results of PERMANOVA performed on the persistent homology analysis output of plant  
757 root systems. n=18 for the P- and P+ treatments, n=9 for the P-/HA and P-/TCP treatments. Post-hoc tests were  
758 performed by running a PERMANOVA for each pairwise comparison and *P* values were adjusted for multiple  
759 comparisons using the Benferroni method.

760

|                       | Df  | <i>F</i> model | <i>P</i> |
|-----------------------|-----|----------------|----------|
| Inoculation treatment | 2   | 11.1650        | 0.000999 |
| P treatment           | 3   | 2.8237         | 0.005994 |
| Interaction           | 6   | 1.2461         | 0.217782 |
| Residuals             | 150 |                |          |

761

762 Post-hoc tests:

|                            | <i>F</i> model | <i>P</i> |
|----------------------------|----------------|----------|
| P- vs P-/TCP               | 1.8911         | 0.68931  |
| P- vs P+                   | 2.1396         | 0.60539  |
| P- vs P-/HA                | 2.5906         | 0.28771  |
| P-/TCP vs P+               | 3.1768         | 0.19780  |
| P-/TCP vs P-/HA            | 1.4693         | 1.00000  |
| P+ vs P-/HA                | 3.5882         | 0.17982  |
| Pfl29ARP vs non-inoculated | 18.7287        | 0.00099  |
| Pfl29ARP vs BveFZB42       | 13.9209        | 0.00099  |
| Non-inoculated vs BveFZB42 | 1.0035         | 0.38462  |

763

764

765 **Online Resource 5** Shoot P concentration and PUE parameters of four-week-old *Brachypodium* plantlets grown  
 766 in Magenta boxes, exposed to contrasted P supplies and either inoculated or not inoculated with bacterial strains  
 767 (n=6 for the P- and P+ treatments, n=3 for the P-/HA and P-/TCP treatments). Results of 3-way ANOVAs  
 768 (degree of freedom “df”, *P* and *F* values) and Dunnett’s *post hoc* tests (annotated with stars; P+ and non-  
 769 inoculated treatments used as references)

|                              | Shoot P concentration<br>( $\mu\text{g P/mg FW}$ ) |       | PU <sub>p</sub> E                        |          | PU <sub>t</sub> E                        |       | PPUE                                      |         |
|------------------------------|----------------------------------------------------|-------|------------------------------------------|----------|------------------------------------------|-------|-------------------------------------------|---------|
|                              | mean                                               | sd    | mean                                     | sd       | Mean                                     | Sd    | mean                                      | sd      |
| <i>P treatment</i>           |                                                    |       |                                          |          |                                          |       |                                           |         |
| P-                           | 0.237*                                             | 0.032 | 2418.692*                                | 662.318  | 4.296*                                   | 0.603 | 1664.549*                                 | 294.805 |
| P-/HA                        | 0.335*                                             | 0.064 | 4146.142*                                | 1768.202 | 3.099*                                   | 0.626 | 1365.267*                                 | 135.433 |
| P-/TCP                       | 0.281*                                             | 0.092 | 3318.446*                                | 1565.915 | 3.940*                                   | 1.267 | 1649.241*                                 | 361.100 |
| P+                           | 0.764                                              | 0.086 | 337.427                                  | 60.022   | 1.325                                    | 0.151 | 915.617                                   | 222.696 |
| ANOVA                        | df=3, $P<2\text{e-}16$ ,<br>$F=292.0433$           |       | df=3, $P<2\text{e-}16$ ,<br>$F=306.9495$ |          | df=3, $P<2\text{e-}16$ ,<br>$F=217.6723$ |       | df=3, $P<2.2\text{e-}16$ ,<br>$F=60.9819$ |         |
| <i>Inoculation treatment</i> |                                                    |       |                                          |          |                                          |       |                                           |         |
| Non-inoculated               | 0.432                                              | 0.233 | 2444.236                                 | 2012.003 | 3.026                                    | 1.488 | 1501.401                                  | 467.108 |
| AviF0819                     | 0.421                                              | 0.243 | 2110.551                                 | 1542.716 | 3.136                                    | 1.493 | 1482.431                                  | 419.206 |
| BveFZB42                     | 0.457                                              | 0.260 | 2255.018                                 | 1662.922 | 2.886                                    | 1.410 | 1304.184                                  | 436.268 |
| BveGB03                      | 0.440                                              | 0.248 | 2247.915                                 | 1942.801 | 2.997                                    | 1.443 | 1354.915                                  | 360.533 |
| Eco99B829                    | 0.457                                              | 0.261 | 2350.842                                 | 2048.284 | 2.937                                    | 1.485 | 1329.075                                  | 453.353 |
| Pfl29ARP                     | 0.412                                              | 0.256 | 1568.265*                                | 1258.735 | 3.298                                    | 1.543 | 1202.833*                                 | 381.678 |
| ANOVA                        | df=5, $P=0.2825$ ,<br>$F=1.2751$                   |       | df=5, $P=0.01069$ ,<br>$F=3.2079$        |          | df=5, $P=0.4357$ ,<br>$F=0.9788$         |       | df=5, $P=0.007738$ ,<br>$F=3.3921$        |         |
| <i>Repetition</i>            |                                                    |       |                                          |          |                                          |       |                                           |         |
| ANOVA                        | df=1, $P=0.6384$ ,<br>$F=0.2225$                   |       | df=1, $P=0.83696$ ,<br>$F=0.0426$        |          | df=1, $P=0.4312$ ,<br>$F=0.6257$         |       | df=1, $P=0.648586$ ,<br>$F=0.2092$        |         |
| <i>Interaction</i>           |                                                    |       |                                          |          |                                          |       |                                           |         |
| P- non-inoculated            | 0.234                                              | 0.031 | 2704.936                                 | 682.528  | 4.350                                    | 0.608 | 1913.742                                  | 245.850 |
| P- AviF0819                  | 0.228                                              | 0.037 | 2476.670                                 | 739.706  | 4.487                                    | 0.686 | 1841.606                                  | 221.698 |
| P- BveFZB42                  | 0.255                                              | 0.037 | 2664.388                                 | 746.187  | 4.009                                    | 0.710 | 1588.721                                  | 289.616 |
| P- BveGB03                   | 0.239                                              | 0.040 | 2412.522                                 | 692.725  | 4.284                                    | 0.701 | 1631.159                                  | 186.833 |
| P- Eco99B829                 | 0.232                                              | 0.033 | 2275.638                                 | 540.169  | 4.378                                    | 0.607 | 1649.714                                  | 296.266 |
| P- Pfl29ARP                  | 0.236                                              | 0.022 | 1977.999                                 | 544.750  | 4.268                                    | 0.430 | 1362.351                                  | 248.987 |
| P-/HA non-inoculated         | 0.357                                              | 0.079 | 4775.731                                 | 2043.682 | 2.896                                    | 0.664 | 1395.929                                  | 126.322 |
| P-/HA AviF0819               | 0.305                                              | 0.044 | 3327.955                                 | 1067.802 | 3.323                                    | 0.456 | 1361.300                                  | 58.025  |
| P-/HA BveFZB42               | 0.344                                              | 0.046 | 3942.647                                 | 989.521  | 2.944                                    | 0.416 | 1283.964                                  | 129.002 |
| P-/HA BveGB03                | 0.363                                              | 0.076 | 4969.660                                 | 2542.434 | 2.836                                    | 0.608 | 1374.750                                  | 154.550 |
| P-/HA Eco99B829              | 0.343                                              | 0.069 | 4684.583                                 | 2454.629 | 2.998                                    | 0.602 | 1449.523                                  | 212.164 |
| P-/HA Pfl29ARP               | 0.295                                              | 0.089 | 3176.275                                 | 1807.334 | 3.594                                    | 1.055 | 1326.138                                  | 163.137 |
| P-/TCP non-inoculated        | 0.296                                              | 0.117 | 3770.126                                 | 2229.912 | 3.826                                    | 1.715 | 1722.268                                  | 566.133 |
| P-/TCP AviF0819              | 0.285                                              | 0.089 | 3654.221                                 | 1536.643 | 3.792                                    | 1.388 | 1765.498                                  | 368.753 |
| P-/TCP BveFZB42              | 0.286                                              | 0.095 | 3586.993                                 | 1625.492 | 3.835                                    | 1.530 | 1714.052                                  | 354.350 |
| P-/TCP BveGB03               | 0.266                                              | 0.067 | 2989.873                                 | 1264.261 | 3.944                                    | 1.112 | 1606.530                                  | 157.781 |
| P-/TCP Eco99B829             | 0.351                                              | 0.141 | 4186.080                                 | 1884.872 | 3.296                                    | 1.666 | 1460.423                                  | 611.666 |
| P-/TCP Pfl29ARP              | 0.203                                              | 0.020 | 1723.384                                 | 157.770  | 4.947                                    | 0.453 | 1626.672                                  | 188.967 |
| P+ non-inoculated            | 0.736                                              | 0.062 | 354.844                                  | 41.169   | 1.368                                    | 0.114 | 1031.362                                  | 204.255 |
| P+ AviF0819                  | 0.741                                              | 0.088 | 363.894                                  | 57.738   | 1.365                                    | 0.163 | 1042.288                                  | 220.108 |
| P+ BveFZB42                  | 0.802                                              | 0.086 | 335.845                                  | 48.824   | 1.260                                    | 0.138 | 824.824                                   | 180.071 |
| P+ BveGB03                   | 0.765                                              | 0.078 | 351.455                                  | 70.629   | 1.318                                    | 0.129 | 942.947                                   | 232.530 |
| P+ Eco99B829                 | 0.791                                              | 0.111 | 341.557                                  | 38.802   | 1.286                                    | 0.186 | 882.537                                   | 248.321 |
| P+ Pfl29ARP                  | 0.751                                              | 0.102 | 276.967                                  | 73.901   | 1.354                                    | 0.193 | 769.744                                   | 189.371 |
| ANOVA                        | df=15, $P=0.5820$ ,<br>$F=0.8858$                  |       | df=15, $P=0.72824$ ,<br>$F=0.7489$       |          | df=15, $P=0.9355$ ,<br>$F=0.4976$        |       | df=15, $P=0.937471$ ,<br>$F=0.4938$       |         |

770
